# Supplementary material
Source: publisher figshare collection journal article supplement (https://aacr.figshare.com/articles/dataset/_/22430124)

Supplementary Figure S1.

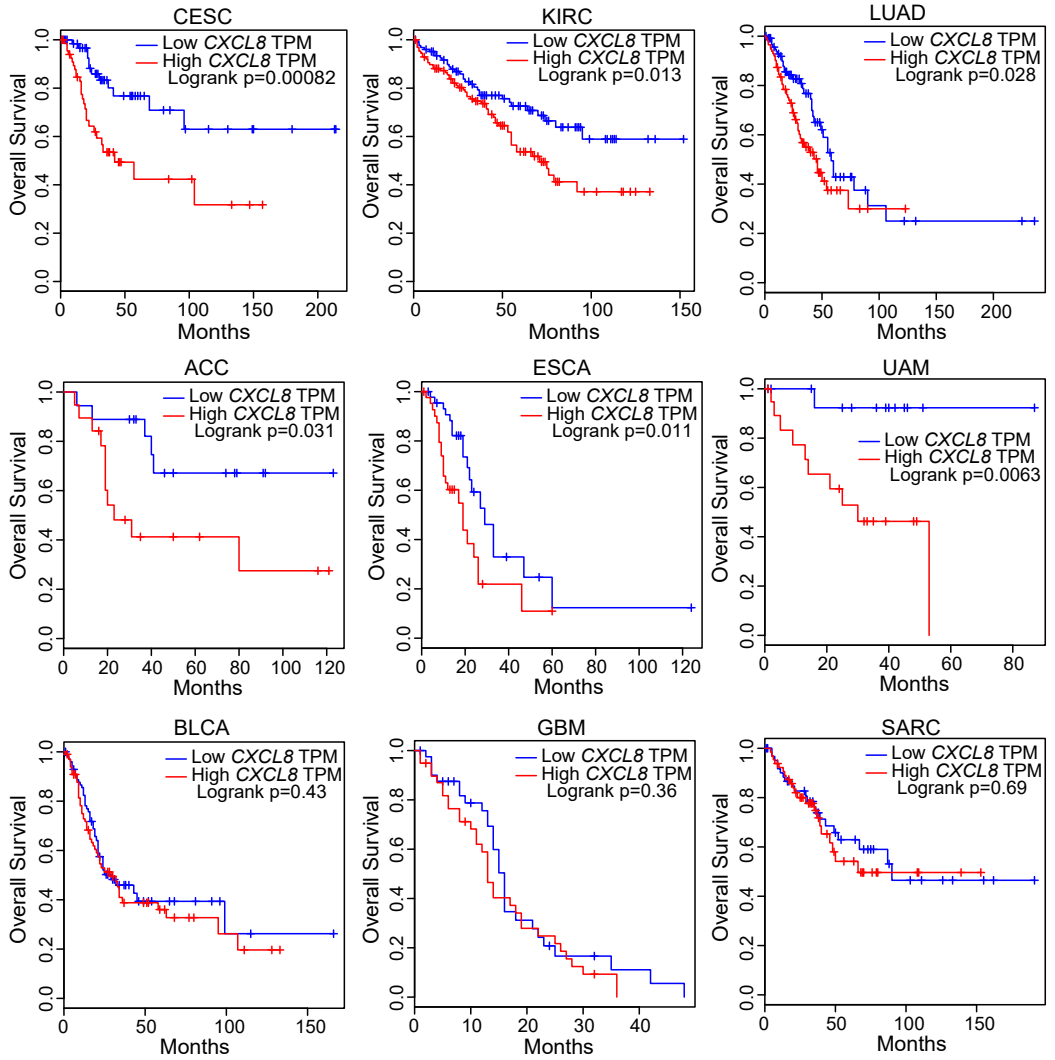

Supplement: Supplementary file 1 [file 39876456]
